# Supplementary material for: Hcp Proteins of the Type VI Secretion System Promote Avian Pathogenic E. coli DE205B (O2:K1) to Induce Meningitis in Rats
Source: MDPI journal article supplement (doi:10.3390/life12091353), 2022-08-31
Supplement: s1 [file s1]

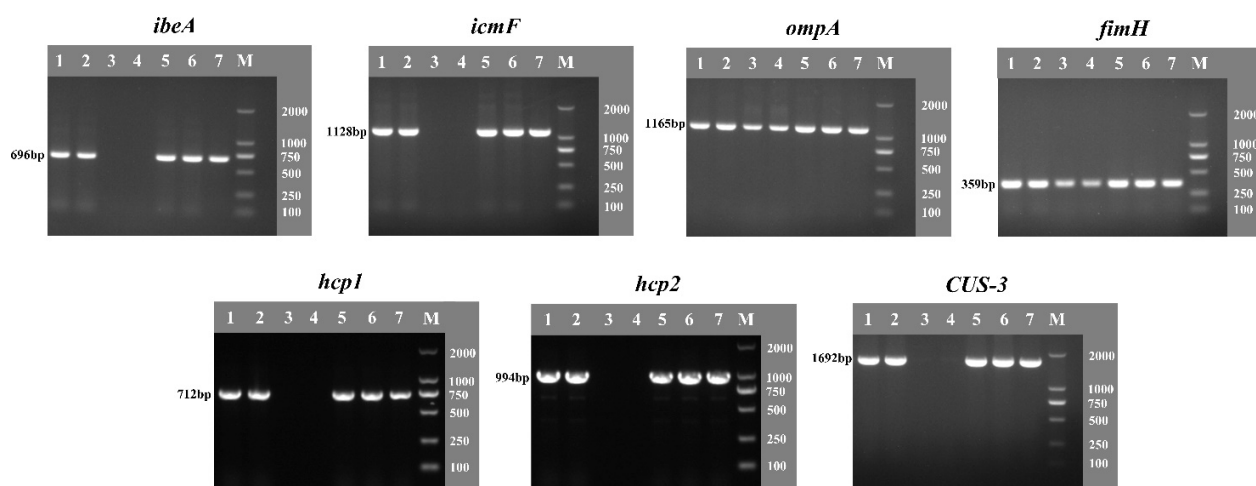

**Figure S1.** Identification of meningitis-related virulence factor by PCR. Lanes 1–2: RS218 positive strains; lanes 3–4: DH5α negative strains; lanes 5–7: DE205B strains; M: DL-2000. The size of the target gene length was mapped.

**A**

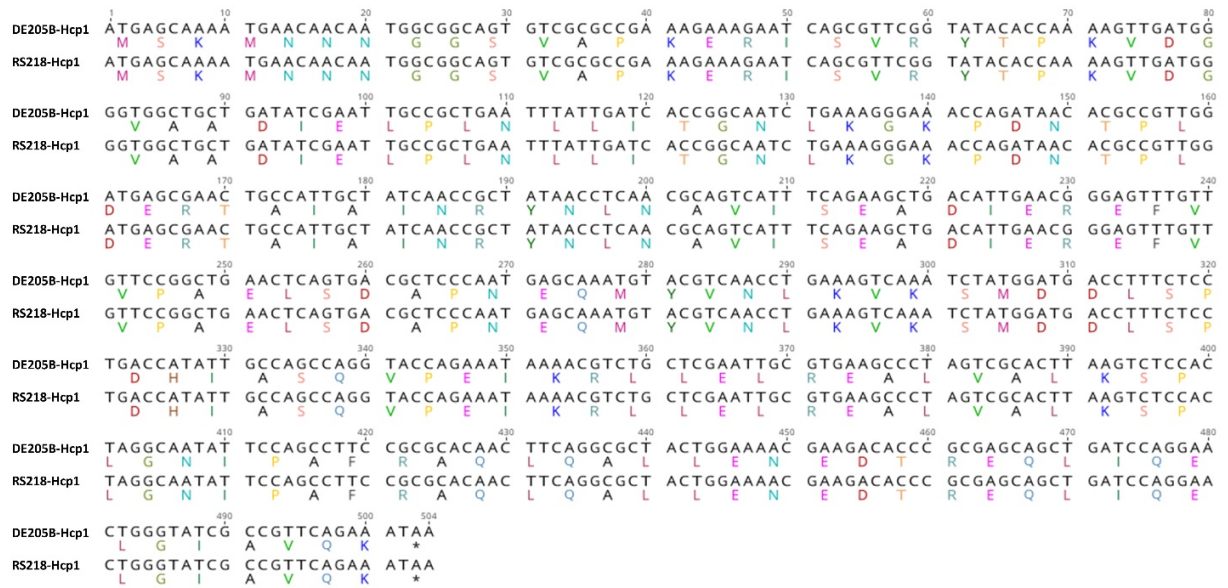

**B**

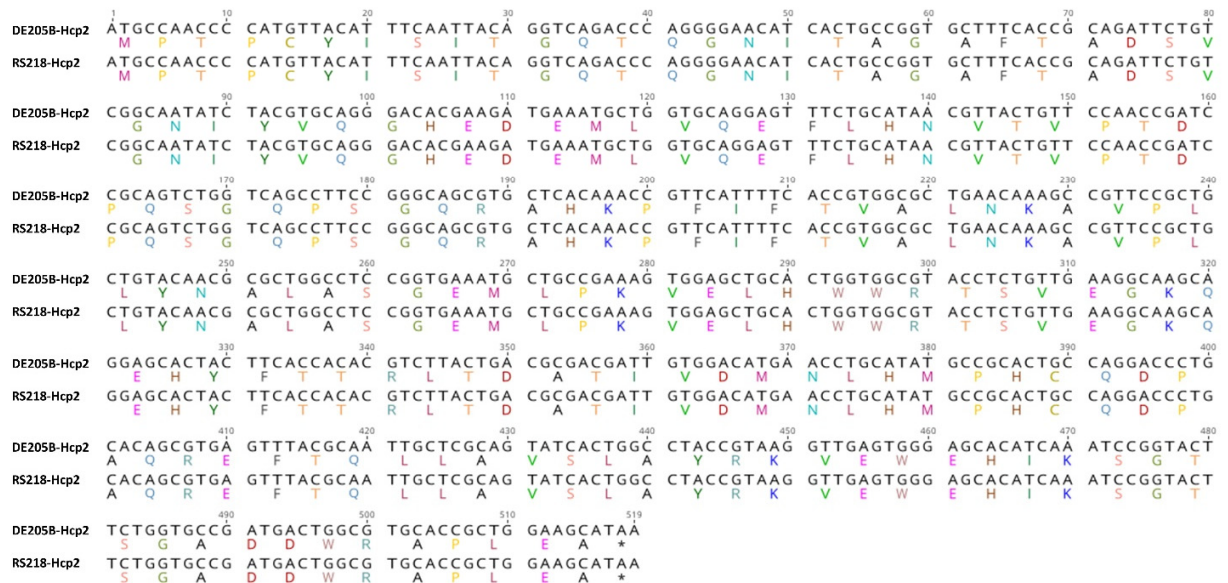

**Figure S2. (A,B)** DNA sequence and amino acid sequence alignment of *hcp1* and *hcp2* between RS218 strain and DE205B strain. *hcp1* and *hcp2* gene of DE205B shares high sequence homology with RS218. “\*” means terminator.
